# Supplementary material for: A Very Low CP Level Reduced Diarrhoea and Productivity in Weaner Pigs, but No Differences between Post-Weaning Diets Including Soybean Meal or Soy Protein Concentrate Were Found
Source: PubMed Central journal article supplement (PMC7998764; doi:10.3390/ani11030678), 2021-03-04
Supplement: animals-11-00678-s001.pdf [file animals-11-00678-s001.pdf]

**A very low CP level reduced diarrhoea and productivity in weaned pigs, but no differences between post-weaning diets including soybean meal or soy protein concentrate were found<sup>1</sup>**

Julie C. Lynegaard, Niels J. Kjeldsen, Julie K. Bache, Nicolai R. Weber, Christian F. Hansen, Jens Peter Nielsen and Charlotte Amdi

**Supplementary materials**

**Table S1.** Composition of the five dietary treatments for weaned pigs in phase 1.

| Item (%)                             | Dietary treatment <sup>1</sup> |      |      |      |      |
|--------------------------------------|--------------------------------|------|------|------|------|
|                                      | PC                             | NC   | SP   | SB   | XLA  |
| Wheat                                | 46.6                           | 47.7 | 53.0 | 51.7 | 59.4 |
| Barley                               | 20.0                           | 20.0 | 20.0 | 20.0 | 20.0 |
| Soybean meal                         | 7.0                            | 7.0  | 0.5  | 7.0  | 0.5  |
| Soy protein concentrate <sup>2</sup> | 6.5                            | 6.4  | 7.5  | 2.2  | 0    |
| Potato protein conc.                 | 4.0                            | 4.0  | 4.0  | 4.0  | 4.0  |
| Fishmeal                             | 2.0                            | 2.0  | 2.0  | 2.0  | 2.0  |
| Whey powder                          | 6.0                            | 6.0  | 6.0  | 6.0  | 6.0  |
| Fatty acid distillate                | 2.4                            | 2.1  | 1.7  | 1.9  | 1.2  |
| Monocalcium phosphate                | 1.4                            | 1.2  | 1.3  | 1.3  | 1.5  |
| Sodium chloride                      | 0.6                            | 0.6  | 0.6  | 0.6  | 0.6  |
| Sodium bicarbonate                   | 0.1                            | 0.1  | 0.1  | 0.1  | 0.1  |
| Lysine sulphate 70%                  | 0.69                           | 0.69 | 0.90 | 0.86 | 1.25 |
| Methionine 98%                       | 0.11                           | 0.11 | 0.15 | 0.15 | 0.23 |
| Threonine 98%                        | 0.13                           | 0.13 | 0.20 | 0.20 | 0.33 |
| Tryptophan 99%                       | 0.05                           | 0.05 | 0.07 | 0.07 | 0.12 |
| Valin 96,5%                          | 0.03                           | 0.03 | 0.05 | 0.05 | 0.20 |
| Mineral-vitamin premix <sup>3</sup>  | 0.40                           | 0.40 | 0.40 | 0.40 | 0.40 |
| Phytase <sup>4</sup>                 | 0.03                           | 0.03 | 0.03 | 0.03 | 0.03 |
| Benzoic acid                         | 0.50                           | 0.50 | 0.50 | 0.50 | 0.50 |
| Calcium formate                      | 1.00                           | 1.00 | 1.00 | 1.00 | 1.00 |
| Microgrits Green <sup>5</sup>        | 0.05                           | 0    | 0    | 0    | 0    |
| Microgrits Blue <sup>5</sup>         | 0                              | 0    | 0.05 | 0    | 0    |
| Zinc oxide                           | 0.30                           | 0    | 0    | 0    | 0    |
| Isoleucine 98,5%                     | 0                              | 0    | 0    | 0    | 0.12 |
| Leucine 98,5%                        | 0                              | 0    | 0    | 0    | 0.22 |
| Histidine 98,5%                      | 0                              | 0    | 0    | 0    | 0.08 |
| Phenylalanine 98,5%                  | 0                              | 0    | 0    | 0    | 0.08 |
| Tyrosine 98,5%                       | 0                              | 0    | 0    | 0    | 0.15 |

<sup>1</sup>PC = Positive control with medicinal zinc oxide; NC = Negative control without medicinal zinc oxide, SP = Soy protein concentrate, SB = Soybean meal, XLA = X-low protein + amino acids.

<sup>2</sup>Vilosoy from Vilomix (Sjølund, Denmark).

<sup>3</sup>DA Vit weaning mix from Danish Agro (Sjølund, Denmark), DA = Danish Agro.

<sup>4</sup>DSM Ronozyme, phytase enzyme from DSM (Brøndby, Denmark).

<sup>5</sup>Microgrits were added to the diets, to ensure that the right feed was delivered from the right silos.

**Table S2.** Composition of the five dietary treatments for weaned pigs in phase 2.

| Item                                 | Dietary treatment <sup>1</sup> |      |      |      |
|--------------------------------------|--------------------------------|------|------|------|
|                                      | PC + NC                        | SP   | SP   | XLA  |
| Wheat                                | 52.1                           | 59.1 | 54.9 | 65.4 |
| Barley                               | 20.0                           | 20.0 | 20.0 | 20.0 |
| Soybean meal                         | 14.0                           | 6.0  | 14.0 | 2.2  |
| Soy protein concentrate <sup>2</sup> | 2.9                            | 2.6  | 0.85 | 0    |
| Potato protein conc.                 | 3.0                            | 3.0  | 2.0  | 3.0  |
| Fishmeal                             | 0                              | 2.0  | 0    | 0.5  |
| Fatty acid distillate                | 2.7                            | 1.9  | 2.5  | 1.5  |
| Monocalcium phosphate                | 0.2                            | 0.1  | 0.2  | 0.1  |
| Sodium chloride                      | 1.3                            | 1.2  | 1.3  | 1.5  |
| Sodium bicarbonate                   | 0.6                            | 0.6  | 0.6  | 0.6  |
| Lysine sulphate 70%                  | 0.1                            | 0.1  | 0.1  | 0.1  |
| Methionine 98%                       | 0.76                           | 0.93 | 0.93 | 1.35 |
| Threonine 98%                        | 0.13                           | 0.15 | 0.17 | 0.24 |
| Tryptophan 99%                       | 0.16                           | 0.22 | 0.23 | 0.36 |
| Valin 96,5%                          | 0.05                           | 0.07 | 0.06 | 0.12 |
| Mineral-vitamin premix <sup>3</sup>  | 0.05                           | 0.07 | 0.08 | 0.23 |
| Phytase <sup>4</sup>                 | 0.40                           | 0.40 | 0.40 | 0.40 |
| Benzoic acid                         | 0.03                           | 0.03 | 0.03 | 0.03 |
| Calcium formate                      | 0.50                           | 0.50 | 0.50 | 0.50 |
| Microgrits Green <sup>5</sup>        | 1.00                           | 1.00 | 1.00 | 1.00 |
| Microgrits Blue <sup>5</sup>         | 0.05                           | 0    | 0    | 0    |
| Zinc oxide                           | 0                              | 0.05 | 0    | 0    |
| Isoleucine 98,5%                     | 0                              | 0    | 0    | 0.14 |
| Leucine 98,5%                        | 0                              | 0    | 0    | 0.26 |
| Histidine 98,5%                      | 0                              | 0    | 0    | 0.09 |
| Phenylalanine 98,5%                  | 0                              | 0    | 0    | 0.1  |
| Tyrosine 98,5%                       | 0                              | 0    | 0    | 0.17 |

<sup>1</sup>PC = Positive control with medicinal zinc oxide; NC = Negative control without medicinal zinc oxide, SP = Soy protein concentrate, SB = Soybean meal, XLA = X-low protein + amino acids.

<sup>2</sup>Vilosoy from Vilomix (Sjølund, Denmark).

<sup>3</sup>DA Vit weaning mix from Danish Agro (Sjølund, Denmark), DA = Danish Agro.

<sup>4</sup>DSM Ronozyme, phytase enzyme from DSM (Brøndby, Denmark).

<sup>5</sup>Microgrits were added to the diets, to ensure that the right feed was delivered from the right silos.

**Table S3.** Composition of the five dietary treatments for weaned pigs in phase 3.

| Item                                 | Dietary treatment <sup>1</sup> |               |
|--------------------------------------|--------------------------------|---------------|
|                                      | PC + NC                        | SP + SB + XLA |
| Wheat                                | 49.8                           | 49.7          |
| Barley                               | 20.0                           | 20.0          |
| Soybean meal                         | 21.0                           | 22.5          |
| Soy protein concentrate <sup>2</sup> | 2.1                            | 0.5           |
| Fatty acid distillate                | 1.9                            | 2.0           |
| Limestone                            | 1.5                            | 1.5           |
| Monocalcium phosphate                | 0.9                            | 0.9           |
| Sodium chloride                      | 0.5                            | 0.5           |
| Sodium bicarbonate                   | 0.1                            | 0.1           |
| Lysin sulphate 70%                   | 0.72                           | 0.81          |
| Methionine 98%                       | 0.14                           | 0.16          |
| Threonine 98%                        | 0.17                           | 0.21          |
| Tryptophan 99%                       | 0.03                           | 0.04          |
| Valin 96,5%                          | 0.06                           | 0.09          |
| Mineral-vitamin premix <sup>3</sup>  | 0.40                           | 0.40          |
| Phytase <sup>4</sup>                 | 0.03                           | 0.03          |
| Benzoic acid                         | 0.50                           | 0.50          |
| Microgrits Green <sup>5</sup>        | 0.05                           | 0             |
| Microgrits Blue <sup>5</sup>         | 0                              | 0.05          |

<sup>1</sup>PC = Positive control with medicinal zinc oxide; NC = Negative control without medicinal zinc oxide, SP = Soy protein concentrate, SB = Soybean meal, XLA = X-low protein + amino acids.

<sup>2</sup>Vilosoy from Vilomix (Sjølund, Denmark).

<sup>3</sup>DA Vit weaning mix from Danish Agro (Sjølund, Denmark), DA = Danish Agro.

<sup>4</sup>DSM Ronozyme, phytase enzyme from DSM (Brøndby, Denmark).

<sup>5</sup>Microgrits were added to the diets, to ensure that the right feed was delivered from the right silos.

**Table S4.** Expected nutritional contents of the five dietary treatments in the three feeding phases for weaned pigs.

| Dietary treatment <sup>1</sup>                  | Phase 1 |       |       |       |       | Phase 2  |       |       |       | Phase 3  |              |
|-------------------------------------------------|---------|-------|-------|-------|-------|----------|-------|-------|-------|----------|--------------|
|                                                 | PC      | NC    | SP    | SB    | XLA   | PC<br>NC | SP    | SB    | XLA   | PC<br>NC | SP SB<br>XLA |
| <b>Chemical composition</b>                     |         |       |       |       |       |          |       |       |       |          |              |
| Energy, FEsv/kg <sup>2</sup>                    | 1.16    | 1.16  | 1.16  | 1.16  | 1.16  | 1.14     | 1.14  | 1.14  | 1.14  | 1.11     | 1.11         |
| ME MJ/kg                                        | 14.2    | 14.2  | 14.2  | 14.2  | 14.2  | 13.9     | 13.9  | 13.9  | 13.9  | 13.5     | 13.5         |
| CP, g/kg                                        | 191.6   | 191.9 | 176.3 | 176.5 | 153.5 | 188.9    | 174.3 | 175.9 | 150.5 | 190.9    | 190.6        |
| Crude fibre, g/kg                               | 27.6    | 27.6  | 27.1  | 27.4  | 26.5  | 30.6     | 29.3  | 30.3  | 28.6  | 32.2     | 32.3         |
| Calcium, g/kg                                   | 7.5     | 7.1   | 7.1   | 7.1   | 7.1   | 6.9      | 6.9   | 7.8   | 6.9   | 8.4      | 8.4          |
| Phosphorous, g/kg                               | 6.4     | 5.9   | 5.9   | 5.1   | 5.9   | 5.8      | 5.8   | 5.9   | 5.9   | 5.2      | 5.2          |
| Zinc, mg/kg                                     | 2500    | 0     | 0     | 0     | 0     | 0        | 0     | 0     | 0     | 0        | 0            |
| Cobber, mg/kg                                   | 0       | 0     | 0     | 0     | 0     | 0        | 0     | 0     | 0     | 0        | 0            |
| <b>Total amino acids, g/kg</b>                  |         |       |       |       |       |          |       |       |       |          |              |
| Lys                                             | 13.7    | 13.7  | 13.5  | 13.4  | 13.2  | 13.4     | 13.2  | 13.4  | 12.9  | 13.0     | 13.4         |
| Met                                             | 4.3     | 4.3   | 4.5   | 4.5   | 4.8   | 4.2      | 4.4   | 4.3   | 4.7   | 4.1      | 4.2          |
| Met + Cys                                       | 7.6     | 7.6   | 7.6   | 7.5   | 7.5   | 7.5      | 7.5   | 7.5   | 7.5   | 7.5      | 7.5          |
| Thr                                             | 8.7     | 8.7   | 8.6   | 8.6   | 8.5   | 8.5      | 8.4   | 8.6   | 8.3   | 8.3      | 8.6          |
| Val                                             | 9.2     | 9.2   | 8.5   | 8.6   | 8.6   | 9.1      | 8.6   | 8.5   | 8.5   | 8.8      | 8.9          |
| His                                             | 4.5     | 4.5   | 4.0   | 4.0   | 4.0   | 4.5      | 4.0   | 4.1   | 3.9   | 4.6      | 4.6          |
| Iso                                             | 7.9     | 7.9   | 7.0   | 7.0   | 6.6   | 7.5      | 6.7   | 6.7   | 6.5   | 7.3      | 7.2          |
| Leu                                             | 14.4    | 14.4  | 12.9  | 13.0  | 12.5  | 13.9     | 12.5  | 12.5  | 12.3  | 13.4     | 13.3         |
| Phe                                             | 9.3     | 9.3   | 8.4   | 8.4   | 7.5   | 9.2      | 8.1   | 8.3   | 7.4   | 9.0      | 8.9          |
| <b>Digestible amino acids<sup>3</sup>, g/kg</b> |         |       |       |       |       |          |       |       |       |          |              |
| SID CP                                          | 167.9   | 168.1 | 154.2 | 154.3 | 134.3 | 165.1    | 152.2 | 153.6 | 131.4 | 167.1    | 166.8        |
| SID Lys                                         | 12.3    | 12.3  | 12.2  | 12.2  | 12.2  | 12.1     | 12.0  | 12.0  | 12.0  | 11.8     | 12.2         |
| SID Met                                         | 4.1     | 4.1   | 4.2   | 4.2   | 4.5   | 3.9      | 4.1   | 4.0   | 4.3   | 3.8      | 3.9          |
| SID Met + Cys                                   | 6.6     | 6.6   | 6.6   | 6.6   | 6.7   | 6.6      | 6.6   | 6.6   | 6.7   | 6.7      | 6.7          |
| SID Thr                                         | 7.5     | 7.5   | 7.5   | 7.5   | 7.5   | 7.4      | 7.4   | 7.4   | 7.4   | 7.2      | 7.5          |
| SID Val                                         | 7.9     | 7.9   | 7.3   | 7.4   | 7.5   | 7.9      | 7.4   | 7.3   | 7.4   | 7.5      | 7.7          |
| SID His                                         | 3.9     | 3.9   | 3.5   | 3.5   | 3.5   | 3.9      | 3.4   | 3.5   | 3.4   | 4.1      | 4.0          |
| SID Iso                                         | 7.0     | 7.0   | 6.1   | 6.1   | 5.8   | 6.6      | 5.8   | 5.8   | 5.7   | 6.4      | 6.3          |
| SID Leu                                         | 12.8    | 12.8  | 11.4  | 11.4  | 11.0  | 12.2     | 11.2  | 10.7  | 10.8  | 11.8     | 11.7         |
| SID Phe                                         | 8.4     | 8.4   | 7.4   | 7.4   | 6.6   | 8.1      | 7.2   | 7.3   | 6.5   | 8.0      | 7.9          |

<sup>1</sup>PC = Positive control with medicinal zinc oxide; NC = Negative control without medicinal zinc oxide, SP = Soy protein concentrateSoybean meal, XLA = X-low protein + amino acids.

<sup>2</sup>FE<sub>sv</sub> = Danish Feed Units, which are potentially physiological energy closely related to net energy.

<sup>3</sup> Standardized ileal digestible = SID: The content of SID CP and amino acids were calculated based on analysed total values of the six dietary treatments and on SID digestibility coefficients of the feed ingredients from Danish Agro (Sjölund, Denmark).
